# Supplementary material
Source: Springer Nature journal article supplement (https://www.springermedizin.de/resource/supplementary/12936_2009_1014_MOESM6_ESM.pdf/9548798)

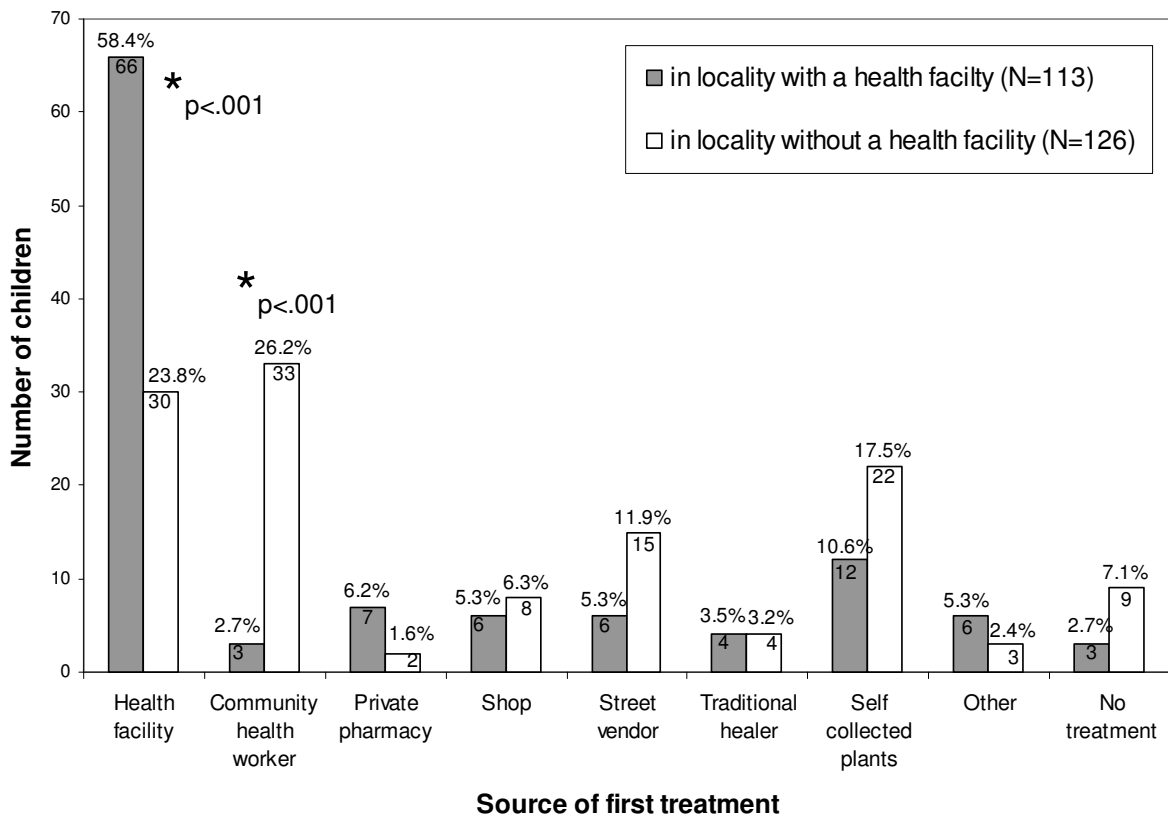

Supplement: MOESM6 [file 9548798]
